# Supplementary material for: The Impact of Liquid Biopsies Positive for EGFR Mutations on Overall Survival in Non-Small Cell Lung Cancer Patients
Source: MDPI journal article supplement (doi:10.3390/diagnostics13142347), 2023-07-12
Supplement: s1 [file s1]

**Supplementary Table 1.** Correlation between the mutational status of the EGFR gene detected by liquid biopsy techniques and alterations in the *ALK*, *ROS1* and *BRAF* genes.

| Molecular Characteristics | Number of patients [n (%)]<br><i>EGFR</i> mutations detected by liquid biopsy |                 | Total of cases<br>(n=38) | <i>P</i> |
|---------------------------|-------------------------------------------------------------------------------|-----------------|--------------------------|----------|
|                           | No<br>(n = 11)                                                                | Yes<br>(n = 27) |                          |          |
| <i>ALK</i> *              |                                                                               |                 |                          |          |
| Negative                  | 8 (100)                                                                       | 24 (100)        | 32 (100)                 | NS       |
| Positive                  | 0 (0)                                                                         | 0 (0)           | 0 (0)                    |          |
| <i>ROS1</i> *             |                                                                               |                 |                          |          |
| Negative                  | 1 (100)                                                                       | 5 (100)         | 6 (100)                  | NS       |
| Positive                  | 0 (0)                                                                         | 0 (0)           | 0 (0)                    |          |
| <i>BRAF</i> *             |                                                                               |                 |                          |          |
| Negative                  | 2 (100)                                                                       | 3 (100)         | 5 (100)                  | NS       |
| Positive                  | 0 (0)                                                                         | 0 (0)           | 0 (0)                    |          |

The study of driver mutations in biopsy sample has been carried out according to current evidence at the time of diagnosis, but due to the scarcity of tumor tissue, alterations in the *ALK*, *ROS1* and *BRAF* genes were performed in 32, 16 and 5 patients; respectively.

**Supplementary Table 2.** Type of mutations detected in the *EGFR* gene in plasma samples from *EGFR* mutated non-small cell lung cancer (NSCLC) patients ( $n=38$ ) during disease follow-up.

| ID | Biopsy mutation | Number of liquid biopsies per patient |                     |               |             |               |               |               |
|----|-----------------|---------------------------------------|---------------------|---------------|-------------|---------------|---------------|---------------|
|    |                 | 1                                     | 2                   | 3             | 4           | 5             | 6             | 7             |
| 1  | del(19)         | WT                                    | WT                  | WT            | WT          | del(19)       | -             | -             |
| 2  | L858R           | L858R                                 | -                   | -             | -           | -             | -             | -             |
| 3  | G719X+S578I     | WT                                    | WT                  | WT            | WT          | WT            | WT            | -             |
| 4  | ins(20)         | WT                                    | -                   | -             | -           | -             | -             | -             |
| 5  | L858R           | L858R                                 | -                   | -             | -           | -             | -             | -             |
| 6  | ins(20)         | ins(20)                               | -                   | -             | -           | -             | -             | -             |
| 7  | L858R           | WT                                    | WT                  | WT            | L858R       | L858R         | L858R         | -             |
| 8  | L858R           | WT                                    | WT                  | WT            | WT          | -             | -             | -             |
| 9  | ins(20)         | WT                                    | -                   | -             | -           | -             | -             | -             |
| 10 | del(19)         | WT                                    | del(19)             | WT            | -           | -             | -             | -             |
| 11 | L858R           | L858R                                 | -                   | -             | -           | -             | -             | -             |
| 12 | del(19)         | del(19)                               | WT                  | -             | -           | -             | -             | -             |
| 13 | del(19)         | del(19)                               | -                   | -             | -           | -             | -             | -             |
| 14 | del(19)         | WT                                    | del(19)             | WT            | del(19)     | del(19)       | -             | -             |
| 15 | del(19)         | WT                                    | WT                  | WT            | -           | -             | -             | -             |
| 16 | del(19)         | L858R                                 | -                   | -             | -           | -             | -             | -             |
| 17 | L858R           | WT                                    | -                   | -             | -           | -             | -             | -             |
| 18 | L858R           | WT                                    | WT                  | WT            | WT          | WT            | WT            | WT            |
| 19 | L858R           | L858R                                 | L858R               | -             | -           | -             | -             | -             |
| 20 | del(19)         | WT                                    | -                   | -             | -           | -             | -             | -             |
| 21 | L858R           | WT                                    | WT                  | WT            | WT          | -             | -             | -             |
| 22 | L858R           | L858R                                 | WT                  | WT            | L858R       | -             | -             | -             |
| 23 | L858R           | WT                                    | WT                  | WT            | -           | -             | -             | -             |
| 24 | L858R           | L858R                                 | L858R               | -             | -           | -             | -             | -             |
| 25 | L858R           | WT                                    | -                   | -             | -           | -             | -             | -             |
| 26 | L858R           | L858R                                 | L858R               | -             | -           | -             | -             | -             |
| 27 | del(19)         | del(19)                               | del(19)+T790M       | del(19)       | del(19)     | -             | -             | -             |
| 28 | del(19)         | del(19)                               | del(19)+T790M       | -             | -           | -             | -             | -             |
| 29 | L858R           | L858R                                 | L858R               | WT            | L858R+T790M | WT            | WT            | WT            |
| 30 | del(19)         | WT                                    | del(19)+T790 M      | -             | -           | -             | -             | -             |
| 31 | del(19)+L861Q   | del(19)+L861Q                         | del(19)+L861Q+T790M | -             | -           | -             | -             | -             |
| 32 | del(19)+T790M   | del(19)+T790M                         | del(19)+T790M       | del(19)+T790M | -           | -             | -             | -             |
| 33 | del(19)         | del(19)                               | del(19)             | del(19)+T790M | -           | -             | -             | -             |
| 34 | L858R           | L858R                                 | WT                  | L858R+T790M   | -           | -             | -             | -             |
| 35 | del(19)         | del(19)                               | del(19)+T790M       | del(19)       | -           | -             | -             | -             |
| 36 | del(19)         | del(19)                               | del(19)+T790M       | WT            | -           | -             | -             | -             |
| 37 | del(19)         | WT                                    | del(19)+T790M       | del(19)       | del(19)     | del(19)+T790M | del(19)+T790M | del(19)+T790M |
| 38 | del(19)         | del(19)+T790M                         | -                   | -             | -           | -             | -             | -             |

WT: Wild Type; -: not done.
